# Supplementary material
Source: publisher figshare collection journal article supplement (https://diabetesjournals.figshare.com/articles/dataset/_/14710284)
Supplement: Supplementary file 1 [file 1]

**Supplementary Table S1.** Discriminative performance of the multi-task deep-learning system in the classification of diabetic macular edema (DME) and center-involved DME (CI-DME) at the B-scan level across primary validation and external testing datasets

| Classification task                    | OCT device     | Dataset    | AUROC<br>(95% CI)      | Sensitivity, %<br>(95% CI) | Specificity, %<br>(95% CI) | Accuracy, %<br>(95% CI) |
|----------------------------------------|----------------|------------|------------------------|----------------------------|----------------------------|-------------------------|
| <b>Presence vs.<br/>absence of DME</b> | Spectralis OCT | Primary    | 0.940<br>(0.934–0.945) | 88.7<br>(86.9–90.3)        | 99.2<br>(99.0–99.5)        | 97.2<br>(96.8–97.6)     |
|                                        |                | External-4 | 0.958<br>(0.951–0.964) | 92.9<br>(89.6–95.3)        | 98.7<br>(98.3 – 99.1)      | 98.2<br>(97.7–98.6)     |
|                                        |                | External-5 | 0.959<br>(0.953–0.964) | 95.5<br>(94.5–96.4)        | 96.3<br>(95.6–96.9)        | 96.0<br>(95.5–96.6)     |
|                                        |                | External-6 | 0.899<br>(0.893–0.905) | 80.4<br>(78.9–81.8)        | 99.4<br>(99.2–99.6)        | 93.6<br>(93.0–94.0)     |
|                                        | Triton OCT     | Primary    | 0.937<br>(0.931–0.942) | 88.5<br>(86.9–90.0)        | 98.8<br>(98.5–99.0)        | 96.8<br>(96.4–97.2)     |
|                                        |                | External-7 | 0.947<br>(0.941–0.953) | 97.5<br>(97.0–98.0)        | 92.0<br>(90.4–100.0)       | 96.1<br>(95.6–96.1)     |
| <b>CI-DME vs.<br/>non-CI-DME</b>       | Spectralis OCT | Primary    | 0.940<br>(0.927–0.954) | 90.3<br>(85.6–93.8)        | 98.1<br>(97.0–98.8)        | 96.1<br>(95.4–97.6)     |
|                                        |                | External-4 | 0.959<br>(0.932–0.978) | 96.4<br>(89.9–99.3)        | 95.4<br>(92.0–97.7)        | 95.7<br>(92.9–97.6)     |
|                                        |                | External-5 | 0.956<br>(0.945–0.965) | 93.8<br>(90.8–96.0)        | 97.4<br>(96.3–98.1)        | 96.6<br>(95.6–97.4)     |
|                                        |                | External-6 | 0.905<br>(0.892–0.916) | 99.4<br>(98.7–99.8)        | 81.6<br>(79.4–83.6)        | 89.2<br>(87.9–90.4)     |
|                                        | Triton OCT     | Primary    | 0.951<br>(0.938–0.961) | 93.6<br>(91.9–95.0)        | 96.5<br>(94.1–98.1)        | 94.4<br>(93.0–95.5)     |
|                                        |                | External-7 | 0.952<br>(0.945–0.959) | 99.5<br>(99.2–99.7)        | 90.1<br>(86.5–94.3)        | 99.0<br>(98.6–99.3)     |

AUROC: area under the receiver operating characteristic curve; CI-DME: center-involved diabetic macular edema, CI: confidence interval; OCT: optical coherence tomography.

**Supplementary Table S2.** Discriminative performance of the multi-task deeplearning system in the classification of non-DME retinal abnormalities at the B-scan level across primary validation and external testing datasets

| Classification task                                         | OCT device     | Dataset    | AUROC<br>(95% CI)      | Sensitivity, %<br>(95% CI) | Specificity, %<br>(95% CI) | Accuracy, %<br>(95% CI) |
|-------------------------------------------------------------|----------------|------------|------------------------|----------------------------|----------------------------|-------------------------|
| Presence vs. absence of<br>non-DME retinal<br>abnormalities | Spectralis OCT | Primary    | 0.975<br>(0.971–0.979) | 95.5<br>(92.3–97.6)        | 90.7<br>(90.0–91.4)        | 90.9<br>(90.2–91.6)     |
|                                                             |                | External-4 | 0.977<br>(0.972–0.982) | 97.0<br>(93.5–98.9)        | 89.3<br>(88.2–90.3)        | 89.7<br>(88.7–90.7)     |
|                                                             |                | External-5 | 0.988<br>(0.985–0.991) | 95.7<br>(93.3–97.4)        | 94.8<br>(94.1–95.4)        | 94.9<br>(94.2–95.5)     |
|                                                             |                | External-6 | 0.924<br>(0.919–0.929) | 86.7<br>(85.4–88.0)        | 92.6<br>(92.0–93.2)        | 91.1<br>(90.5–91.6)     |
|                                                             | Triton OCT     | Primary    | 0.962<br>(0.958–0.966) | 95.3<br>(92.8–97.1)        | 94.1<br>(93.5–94.6)        | 94.2<br>(93.6–94.7)     |
|                                                             |                | External-7 | 0.948<br>(0.942–0.954) | 86.8<br>(83.9–89.3)        | 91.9<br>(91.1–92.6)        | 91.3<br>(90.5–92.0)     |

AUROC: area under the receiver operating characteristic curve; CI-DME: center-involved diabetic macular edema, CI: confidence interval; OCT: optical coherence tomography.

**Supplementary Table S3.** Diagnostic performance of the deep-learning system in DME detection when only one scan from one eye was included in the primary dataset.

| Classification task            | OCT device     | Dataset | AUROC<br>(95% CI)      | Sensitivity, %<br>(95% CI) | Specificity, %<br>(95% CI) | Accuracy, %<br>(95% CI) |
|--------------------------------|----------------|---------|------------------------|----------------------------|----------------------------|-------------------------|
| Presence vs.<br>absence of DME | Cirrus HD-OCT  | Primary | 0.915<br>(0.867–0.950) | 82.9<br>(67.9–92.8)        | 100.0<br>(97.7–100.0)      | 96.5<br>(92.9–98.6)     |
|                                | Spectralis OCT | Primary | 0.938<br>(0.877–0.975) | 88.9<br>(73.9–96.9)        | 98.7<br>(93.1–100.0)       | 95.6<br>(90.1–98.6)     |
|                                | Triton OCT     | Primary | 0.989<br>(0.962–0.998) | 98.5<br>(92.1–100.0)       | 99.2<br>(95.7–100.0)       | 99.0<br>(96.3–99.9)     |
| CI-DME vs.<br>non-CI-DME       | Cirrus HD-OCT  | Primary | 0.966<br>(0.839–0.999) | 93.1<br>(77.2–99.2)        | 100.0<br>(47.8–100.0)      | 94.1<br>(80.3–99.3)     |
|                                | Spectralis OCT | Primary | 0.952<br>(0.813–0.996) | 90.5<br>(69.6–98.8)        | 100.0<br>(71.5–100.0)      | 93.8<br>(79.2–99.2)     |
|                                | Triton OCT     | Primary | 0.974<br>(0.902–0.997) | 100.0<br>(92.6–100.0)      | 94.7<br>(74.0–99.9)        | 98.5<br>(92.0–100.0)    |

AUROC: area under the receiver operating characteristic curve; CI: confidence interval; OCT: optical coherence tomography.

**Supplementary Table S4.** Diagnostic performance of the deep-learning system in non-DME retinal abnormalities detection performances when only one scan from one eye was included in the primary dataset.

| Classification task                                             | OCT device     | Dataset | AUROC<br>(95% CI)      | Sensitivity, %<br>(95% CI) | Specificity, %<br>(95% CI) | Accuracy, %<br>(95% CI) |
|-----------------------------------------------------------------|----------------|---------|------------------------|----------------------------|----------------------------|-------------------------|
| Presence vs.<br>absence of non-<br>DME retinal<br>abnormalities | Cirrus HD-OCT  | Primary | 0.938<br>(0.895–0.967) | 93.3<br>(81.7–98.6)        | 88.9<br>(82.8–93.4)        | 89.9<br>(84.8–93.3)     |
|                                                                 | Spectralis OCT | Primary | 0.993<br>(0.955–0.999) | 91.7<br>(61.5–99.8)        | 100.0<br>(96.5–100.0)      | 99.1<br>(95.3–100.0)    |
|                                                                 | Triton OCT     | Primary | 0.978<br>(0.946–0.994) | 100.0<br>(82.4–100.0)      | 92.6<br>(87.6–96.0)        | 93.3<br>(88.8–96.4)     |

AUROC: area under the receiver operating characteristic curve; CI: confidence interval; OCT: optical coherence tomography.

**Supplementary Table S5.** Characteristics of subjects with non-DME retinal abnormalities in the primary dataset.

| <b><u>Dataset</u></b> | <b><u>OCT device</u></b> | <b><u>Total sample<br/>n=14,246</u></b> | <b><u>Sample for DME classification module</u></b> |                   |               |
|-----------------------|--------------------------|-----------------------------------------|----------------------------------------------------|-------------------|---------------|
|                       |                          |                                         | <b>No DME</b>                                      | <b>Non-CI-DME</b> | <b>CI-DME</b> |
| <b>Primary</b>        | Cirrus HD-OCT            | No. of OCT volumes                      | 253                                                | 29                | 101           |
|                       |                          | No. of eyes                             | 69                                                 | 14                | 28            |
|                       |                          | No. of subjects                         | 41                                                 | 10                | 21            |
|                       |                          | Gender (male, %)                        | 16 (39.0)                                          | 5 (50.0)          | 9 (42.9)      |
|                       |                          | Age (years, SD)                         | 70.4 (11.6)                                        | 69.7 (8.9)        | 63.9 (8.2)    |
|                       | Spectralis OCT           | No. of OCT volumes                      | 189                                                | 60                | 104           |
|                       |                          | No. of OCT B-scans                      | 3,452                                              | 1,025             | 223           |
|                       |                          | No. of eyes                             | 96                                                 | 29                | 37            |
|                       |                          | No. of subjects                         | 60                                                 | 20                | 23            |
|                       |                          | Gender (male, %)                        | 32 (53.3)                                          | 10 (50.0)         | 14 (60.9)     |
|                       |                          | Age (years, SD)                         | 62.8 (10.3)                                        | 63.9 (10.5)       | 69.6 (9.8)    |
|                       | Triton OCT               | No. of OCT volumes                      | 665                                                | 162               | 342           |
|                       |                          | No. of OCT B-scans                      | 6,661                                              | 648               | 1854          |
|                       |                          | No. of eyes                             | 239                                                | 48                | 140           |
|                       |                          | No. of subjects                         | 104                                                | 25                | 98            |
|                       |                          | Gender (male, %)                        | 66 (63.5)                                          | 12 (48.0)         | 46 (46.9)     |
|                       |                          | Age (years, SD)                         | 58.9 (13.0)                                        | 64.9 (12.6)       | 63.0 (11.4)   |

CI-DME: center-involved diabetic macular edema; OCT: optical coherence tomography; SD: standard deviation.

**Supplementary Table S6.** Characteristics of subjects with DME in the primary dataset.

| <u>Dataset</u> | <u>OCT device</u> | <u>Total sample</u><br><br><b>n=14,454</b> | <u>Sample for non-DME retinal abnormalities</u><br><u>classification module</u> |                 |
|----------------|-------------------|--------------------------------------------|---------------------------------------------------------------------------------|-----------------|
|                |                   |                                            | <b>Absence</b>                                                                  | <b>Presence</b> |
| <b>Primary</b> | Cirrus HD-OCT     | No. of OCT volumes                         | 1,078                                                                           | 130             |
|                |                   | No. of eyes                                | 242                                                                             | 42              |
|                |                   | No. of subjects                            | 148                                                                             | 31              |
|                |                   | Gender (male, %)                           | 89 (60.1)                                                                       | 14 (45.2)       |
|                |                   | Age (years, SD)                            | 62.6 (9.8)                                                                      | 63.8 (9.6)      |
|                | Spectralis OCT    | No. of OCT volumes                         | 367                                                                             | 164             |
|                |                   | No. of OCT B-scans                         | 4,194                                                                           | 1,248           |
|                |                   | No. of eyes                                | 111                                                                             | 66              |
|                |                   | No. of subjects                            | 67                                                                              | 43              |
|                |                   | Gender (male, %)                           | 43 (64.2)                                                                       | 24 (55.8)       |
|                |                   | Age (years, SD)                            | 62.0 (10.6)                                                                     | 64.4 (11.0)     |
|                | Triton OCT        | No. of OCT volumes                         | 707                                                                             | 504             |
|                |                   | No. of OCT B-scans                         | 5,302                                                                           | 2,502           |
|                |                   | No. of eyes                                | 197                                                                             | 188             |
|                |                   | No. of subjects                            | 100                                                                             | 123             |
|                |                   | Gender (male, %)                           | 50 (50.0)                                                                       | 58 (47.2)       |
|                |                   | Age (years, SD)                            | 62.9 (11.6)                                                                     | 65.1 (10.1)     |

CI-DME: center-involved diabetic macular edema; OCT: optical coherence tomography; SD: standard deviation.

**Supplementary Table S7.** Diagnostic performance of the deep-learning system in DME detection among eyes with non-DME retinal abnormalities across primary dataset.

| Classification task               | OCT device     | Dataset | AUROC<br>(95% CI)      | Sensitivity, %<br>(95% CI) | Specificity, %<br>(95% CI) | Accuracy, %<br>(95% CI) |
|-----------------------------------|----------------|---------|------------------------|----------------------------|----------------------------|-------------------------|
| Presence vs.<br>absence of<br>DME | Cirrus HD-OCT  | Primary | 0.964<br>(0.912–0.990) | 92.9<br>(66.1–99.8)        | 100.0<br>(96.4–100)        | 99.1<br>(95.3–100.0)    |
|                                   | Spectralis OCT | Primary | 0.846<br>(0.664–0.952) | 69.2<br>(38.6–90.9)        | 100<br>(79.4 –100.0)       | 86.2<br>(68.3–96.1)     |
|                                   | Triton OCT     | Primary | 0.935<br>(0.851–0.980) | 96.8<br>(83.3–99.9)        | 90.2<br>(76.9–97.3)        | 93.1<br>(84.5–97.7)     |

AUROC: area under the receiver operating characteristic curve; CI: confidence interval; OCT: optical coherence tomography.

**Supplementary Table S8.** Diagnostic performance of the deep-learning system in the detection of non-DME retinal abnormalities among eyes with DME across primary dataset.

| Classification task                                   | OCT device     | Dataset | AUROC (95% CI)      | Sensitivity, % (95% CI) | Specificity, % (95% CI) | Accuracy, % (95% CI) |
|-------------------------------------------------------|----------------|---------|---------------------|-------------------------|-------------------------|----------------------|
| Presence vs. absence of non-DME retinal abnormalities | Cirrus HD-OCT  | Primary | 0.927 (0.883–0.958) | 92.9 (66.1–99.8)        | 92.5 (87.9–95.7)        | 92.5 (88.1–95.7)     |
|                                                       | Spectralis OCT | Primary | 0.917 (0.869–0.952) | 87.5 (61.7–98.4)        | 96.0 (91.9–98.4)        | 95.3 (91.2–97.8)     |
|                                                       | Triton OCT     | Primary | 0.947 (0.922–0.967) | 97.6 (87.1–99.9)        | 91.9 (88.7–94.4)        | 92.5 (89.5–94.8)     |

AUROC: area under the receiver operating characteristic curve; CI: confidence interval; OCT: optical coherence tomography.
